# Supplementary material
Source: Elsevier journal article supplement (https://publikationen.ub.uni-frankfurt.de/opus4/files/44116/mmc1.doc)
Supplement: mmc1 [file mmc1.doc]

# Supplementary material


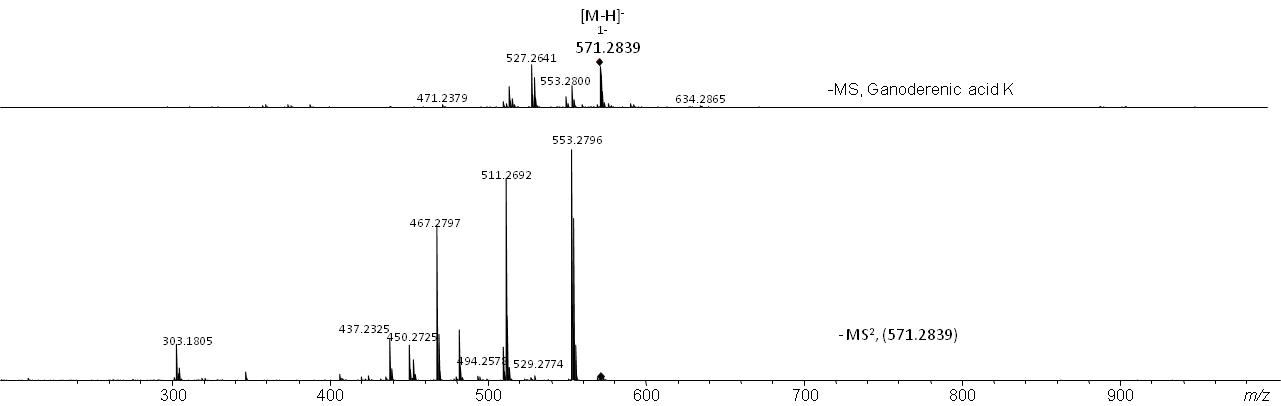


**Fig. S1.** Mass spectrometry spectra MS of ganoderenic acid K (**1**) identified from *Ganoderma lucidum* (M9720).


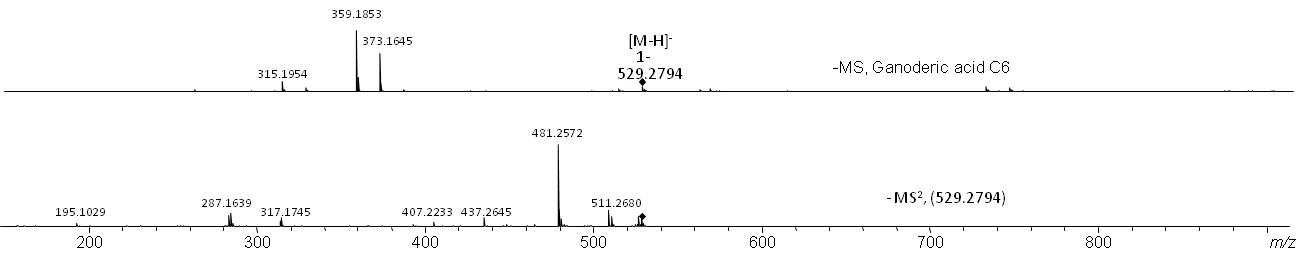


**Fig. S2.** Mass spectrometry spectra MS of ganoderic acid C6 (**2**) identified from *Ganoderma lucidum* (M9720).


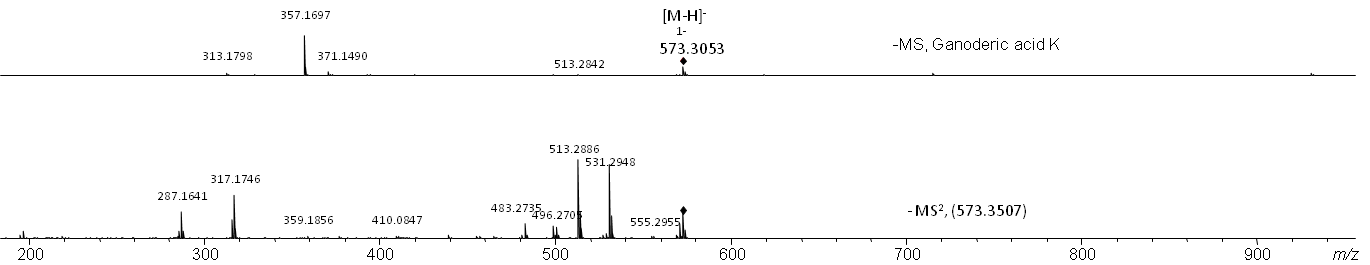


**Fig. S3.** Mass spectrometry spectra MS of ganoderic acid K (**3**) identified from *Ganoderma lucidum* (M9720).


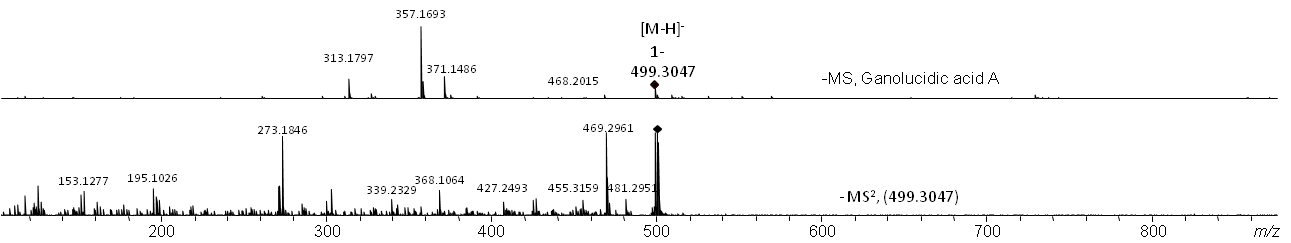


**Fig. S4.** Mass spectrometry spectra MS of ganolucidic acid A (**4**) identified from *Ganoderma lucidum* (M9720).


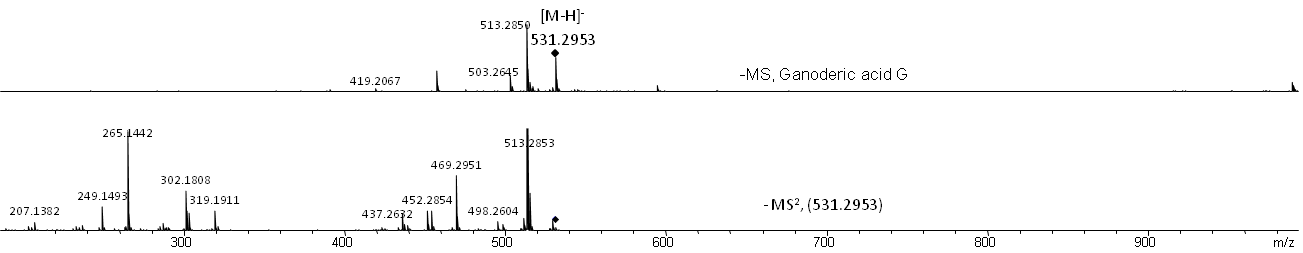


**Fig. S5.** Mass spectrometry spectra MS of ganoderic acid G (**5**) identified from *Ganoderma lingzhi* (M9724).


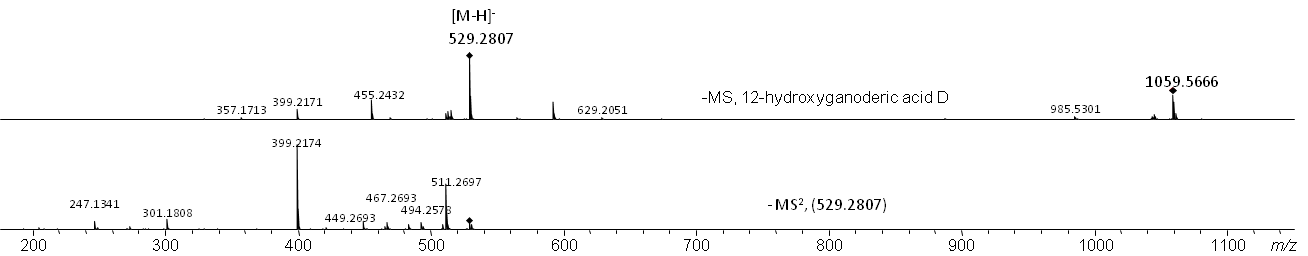


**Fig. S6.** Mass spectrometry spectra MS of 12-hydroxyganoderic acid D (**6**) identified from *Ganoderma lingzhi* (M9724).


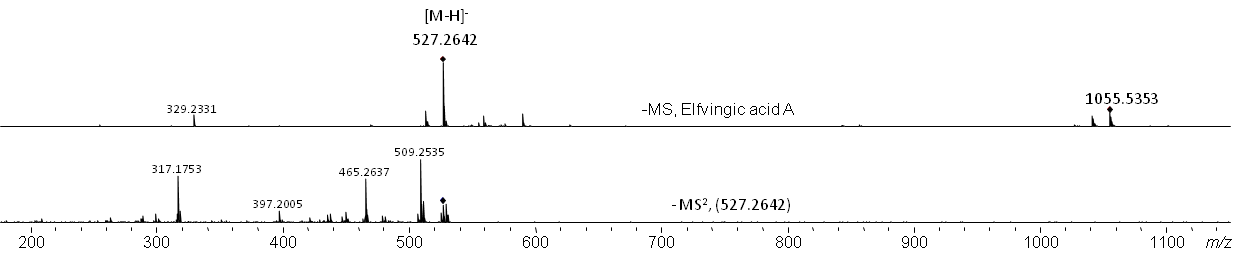


**Fig. S7.** Mass spectrometry spectra MS of elfvingic acid A (**7**) identified from *Ganoderma lingzhi* (M9724).


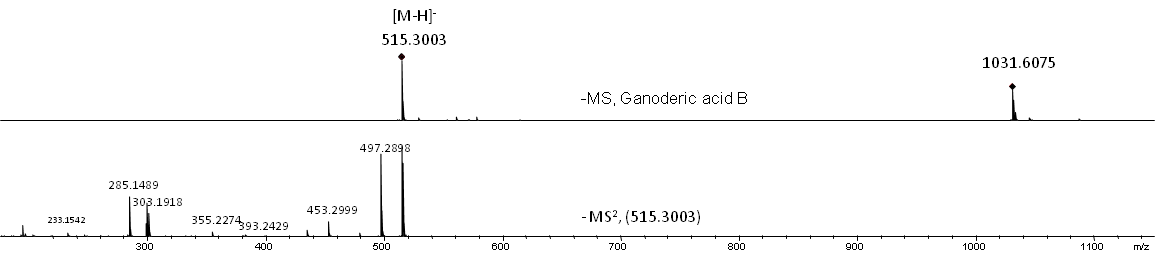


**Fig. S8.** Mass spectrometry spectra MS of ganoderic acid B (**8**) identified from *Ganoderma lingzhi* (M9724).


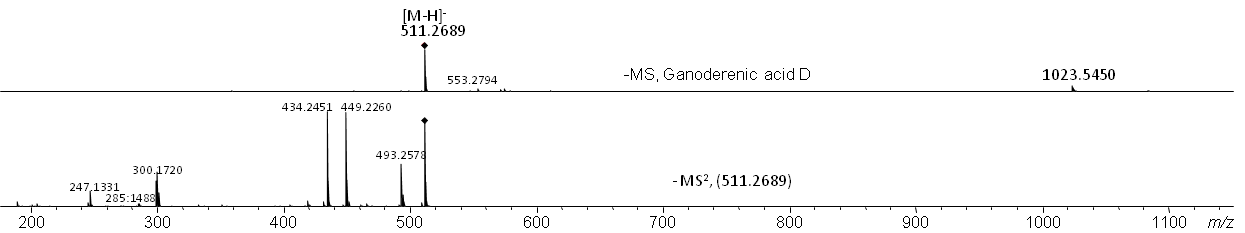


**Fig. S9.** Mass spectrometry spectra MS of ganoderenic acid D (**9**) identified from *Ganoderma lingzhi* (M9724).


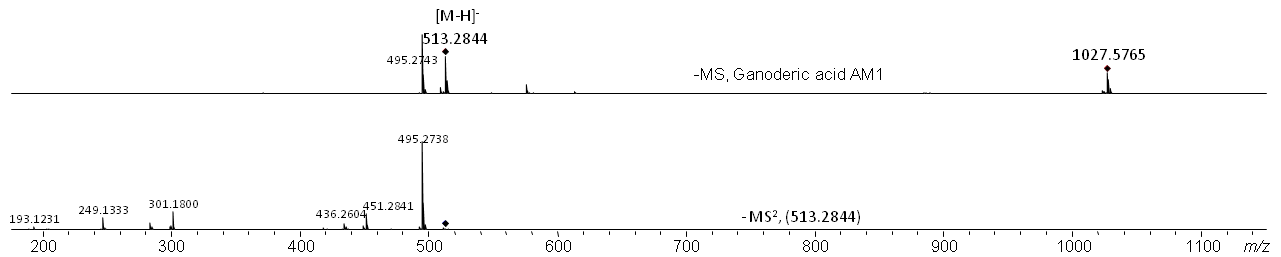


**Fig. S10.** Mass spectrometry spectra MS of ganoderic acid AM1 (**10**) identified from *Ganoderma lingzhi* (M9724).


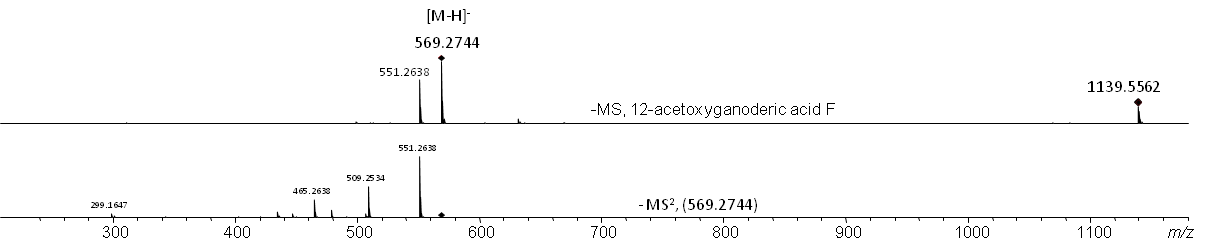


**Fig. S11.** Mass spectrometry spectra MS of 12-acetoxyganoderic acid F (**11**) identified from *Ganoderma lingzhi* (M9724).


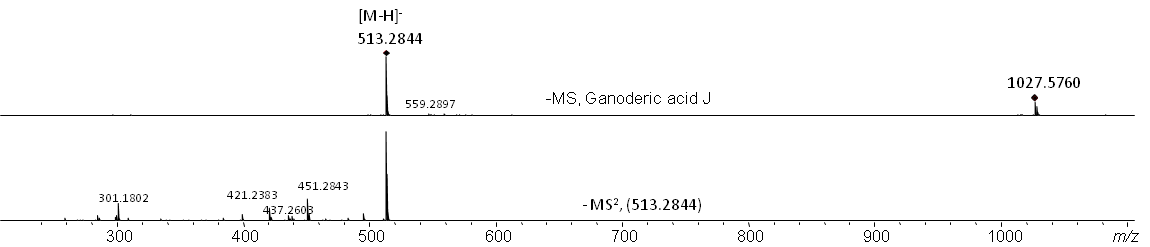


**Fig. S12.** Mass spectrometry spectra MS of ganoderic acid J (**12**) identified from *Ganoderma lingzhi* (M9724).
